# Supplementary material for: Characterization of long-chain fatty acid-linked bile acids: a major conjugation form of 3β-hydroxy bile acids in feces
Source: PubMed Central journal article supplement (PMC9587409; doi:10.1016/j.jlr.2022.100275), 2022-09-09
Supplement: mmc2.pdf [file mmc2.pdf]

**Supplemental Table S1 (Appendix)**

Abbreviations and corresponding trivial names of the Fatty acid-bile acid esters, fatty acids, and bile acids used in this study.

| Abbreviations              | Trivial names                                                                               | Structure<br>Lipid Maps ID   |
|----------------------------|---------------------------------------------------------------------------------------------|------------------------------|
| Fatty acid-bile acid ester |                                                                                             |                              |
| Ac-isoLCA                  | 3 $\beta$ -acetoxy-5 $\beta$ -cholanoic acid                                                |                              |
| Pam-isoLCA                 | 3 $\beta$ -hexadecanoyloxy-5 $\beta$ -cholanoic acid                                        |                              |
| Ste-isoLCA                 | 3 $\beta$ -octadecanoyloxy-5 $\beta$ -cholanoic acid                                        |                              |
| Ole-isoLCA                 | 3 $\beta$ -(9-cis-octadecenoyloxy)-5 $\beta$ -cholanoic acid                                |                              |
| Lin-isoLCA                 | 3 $\beta$ -(9-cis,12-cis-octadecadienoyloxy)-5 $\beta$ -cholanoic acid                      |                              |
| Ac-isoDCA                  | 3 $\beta$ -acetoxy-12 $\alpha$ -hydroxy-5 $\beta$ -cholanoic acid                           |                              |
| Pam-isoDCA                 | 3 $\beta$ -hexadecanoyloxy-12 $\alpha$ -hydroxy-5 $\beta$ -cholanoic acid                   |                              |
| Ste-isoDCA                 | 3 $\beta$ -octadecanoyloxy-12 $\alpha$ -hydroxy-5 $\beta$ -cholanoic acid                   |                              |
| Ole-isoDCA                 | 3 $\beta$ -(9-cis-octadecenoyloxy)-12 $\alpha$ -hydroxy-5 $\beta$ -cholanoic acid           |                              |
| Lin-isoDCA                 | 3 $\beta$ -(9-cis,12-cis-octadecadienoyloxy)-12 $\alpha$ -hydroxy-5 $\beta$ -cholanoic acid |                              |
| Ac-LCA                     | 3 $\alpha$ -acetoxy-5 $\beta$ -cholanoic acid                                               |                              |
| Ste-LCA                    | 3 $\alpha$ -octadecanoyloxy-5 $\beta$ -cholanoic acid                                       |                              |
| Ste-DCA                    | 3 $\alpha$ -octadecanoyloxy-12 $\alpha$ -hydroxy-5 $\beta$ -cholanoic acid                  |                              |
| Fatty acid                 |                                                                                             |                              |
| Palmitic acid              | hexadecanoic acid                                                                           | <a href="#">LMFA01010001</a> |
| Stearic acid               | octadecanoic acid                                                                           | <a href="#">LMFA01010018</a> |
| Oleic acid                 | 9-cis-Octadecenoic acid                                                                     | <a href="#">LMFA01030002</a> |
| Linoleic acid              | 9-cis,12-cis-Octadecadienoic acid                                                           | <a href="#">LMFA01030120</a> |
| Bile acid                  |                                                                                             |                              |
| CA                         | cholic acid                                                                                 | <a href="#">LMST04010001</a> |
| alloCA                     | 3 $\alpha$ ,7 $\alpha$ ,12 $\alpha$ -trihydroxy-5 $\alpha$ -cholanoic acid                  | <a href="#">LMST04010092</a> |
| isoCA                      | 3 $\beta$ ,7 $\alpha$ ,12 $\alpha$ -trihydroxy-5 $\beta$ -cholanoic acid                    | <a href="#">LMST04010086</a> |
| 3-oxo-CA                   | 7 $\alpha$ ,12 $\alpha$ -dihydroxy-3-oxo-5 $\beta$ -cholanolic acid                         | <a href="#">LMST04010443</a> |
| 7-oxo-DCA                  | 3 $\alpha$ ,12 $\alpha$ -dihydroxy-7-oxo-5 $\beta$ -cholanoic acid                          | <a href="#">LMST04010184</a> |
| 12-oxo-CDCA                | 3 $\alpha$ ,7 $\alpha$ -dihydroxy-12-oxo-5 $\beta$ -cholanolic acid                         | <a href="#">LMST04010180</a> |
| UCA                        | 3 $\alpha$ ,7 $\beta$ ,12 $\alpha$ -trihydroxy-5 $\beta$ -cholanoic acid                    | <a href="#">LMST04010088</a> |
| isoUCA                     | 3 $\beta$ ,7 $\beta$ ,12 $\alpha$ -trihydroxy-5 $\beta$ -cholanoic acid                     | <a href="#">LMST04010090</a> |
| HCA                        | 3 $\alpha$ ,6 $\alpha$ ,7 $\alpha$ -trihydroxy-5 $\beta$ -cholanoic acid                    | <a href="#">LMST04010064</a> |
| CDCA                       | chenodeoxycholic acid                                                                       | <a href="#">LMST04010032</a> |
| alloCDCA                   | 3 $\alpha$ ,7 $\alpha$ -dihydroxy-5 $\alpha$ -cholanoic acid                                | <a href="#">LMST04010036</a> |
| isoCDCA                    | 3 $\beta$ ,7 $\alpha$ -dihydroxy-5 $\beta$ -cholanoic acid                                  | <a href="#">LMST04010034</a> |

|                            |                                                               |                              |
|----------------------------|---------------------------------------------------------------|------------------------------|
| 3-oxo-CDCA                 | 7 $\alpha$ -hydroxy-3-oxo-5 $\beta$ -cholanic acid            | <a href="#">LMST04010161</a> |
| 3-oxo-alloCDCA             | 7 $\alpha$ -hydroxy-3-oxo-5 $\alpha$ -cholanic acid           | <a href="#">LMST04010163</a> |
| 7-oxo-LCA                  | 3 $\alpha$ -hydroxy-7-oxo-5 $\beta$ -cholanic acid            | <a href="#">LMST04010150</a> |
| UDCA                       | Ursodeoxycholic acid                                          | <a href="#">LMST04010033</a> |
| isoUDCA                    | 3 $\alpha$ ,7 $\beta$ -dihydroxy-5 $\beta$ -cholanoic acid    | <a href="#">LMST04010035</a> |
| 3-oxo-UDCA                 | 7 $\beta$ -hydroxy-3-oxo-5 $\beta$ -cholanic acid             | <a href="#">LMST04010162</a> |
| DCA                        | deoxycholic acid                                              | <a href="#">LMST04010040</a> |
| alloDCA                    | 3 $\alpha$ ,12 $\alpha$ -dihydroxy-5 $\alpha$ -cholanoic acid | <a href="#">LMST04010044</a> |
| isoDCA                     | 3 $\beta$ ,12 $\alpha$ -dihydroxy-5 $\beta$ -cholanoic acid   | <a href="#">LMST04010042</a> |
| isoalloDCA                 | 3 $\beta$ ,12 $\alpha$ -dihydroxy-5 $\alpha$ -cholanoic acid  | <a href="#">LMST04010046</a> |
| 3-oxo-DCA                  | 12 $\alpha$ -hydroxy-3-oxo-5 $\beta$ -cholanic acid           | <a href="#">LMST04010168</a> |
| 3-oxo-alloDCA              | 12 $\alpha$ -hydroxy-3-oxo-5 $\alpha$ -cholanic acid          | <a href="#">LMST04010169</a> |
| 12 $\beta$ -OH-LCA         | 3 $\alpha$ ,12 $\beta$ -dihydroxy-5 $\beta$ -cholanoic acid   | <a href="#">LMST04010045</a> |
| 12 $\beta$ -OH-isoLCA      | 3 $\beta$ ,12 $\beta$ -dihydroxy-5 $\beta$ -cholanoic acid    | <a href="#">LMST04010047</a> |
| 12-oxo-LCA                 | 3 $\alpha$ -hydroxy-12-oxo-5 $\beta$ -cholanic acid           | <a href="#">LMST04010155</a> |
| 12-oxo-isoLCA              | 3 $\beta$ -hydroxy-12-oxo-5 $\beta$ -cholanic acid            | <a href="#">LMST04010156</a> |
| LCA                        | lithocholic acid                                              | <a href="#">LMST04010003</a> |
| alloLCA                    | 3 $\alpha$ -hydroxy-5 $\alpha$ -cholanoic acid                | <a href="#">LMST04010005</a> |
| isoLCA                     | 3 $\beta$ -hydroxy-5 $\beta$ -cholanoic acid                  | <a href="#">LMST04010004</a> |
| isoalloLCA                 | 3 $\beta$ -hydroxy-5 $\alpha$ -cholanoic acid                 | <a href="#">LMST04010006</a> |
| 3-oxo-LCA                  | 3-oxo-5 $\beta$ -cholanic acid                                | <a href="#">LMST04010127</a> |
| 3-oxo-alloLCA              | 3-oxo-5 $\alpha$ -cholanic acid                               | <a href="#">LMST04010128</a> |
| HDCA                       | 3 $\alpha$ ,6 $\alpha$ -dihydroxy-5 $\beta$ -cholanoic acid   | <a href="#">LMST04010024</a> |
| MDCA                       | 3 $\alpha$ ,6 $\beta$ -dihydroxy-5 $\beta$ -cholanoic acid    | <a href="#">LMST04010025</a> |
| CA- $\Delta^4$ -3-one      | 7 $\alpha$ ,12 $\alpha$ -dihydroxy-3-oxo-4-cholenoic acid     | <a href="#">LMST04030114</a> |
| DCA- $\Delta^{4,6}$ -3-one | 12 $\alpha$ -hydroxy-3-oxo-4,6-choladienoic acid              | <a href="#">LMST04010245</a> |
| CDCA- $\Delta^4$ -3-one    | 7 $\alpha$ -hydroxy-3-oxo-4-cholenoic acid                    | <a href="#">LMST04030123</a> |
| LCA- $\Delta^{4,6}$ -3-one | 3-oxo-4,6-choladienoic acid                                   | <a href="#">LMST04010235</a> |
| DCA- $\Delta^4$ -3-one     | 12 $\alpha$ -hydroxy-3-oxo-4-cholenoic acid                   | <a href="#">LMST04010198</a> |
| LCA- $\Delta^4$ -3-one     | 3-oxo-4-cholenoic acid                                        | <a href="#">LMST04010233</a> |
| nor-CA                     | 3,7,12-trihydroxy-24-nor-5 $\beta$ -cholan-23-oic acid        | <a href="#">LMST04060019</a> |
| GCA                        | glycocholic acid                                              | <a href="#">LMST05030001</a> |
| TCA                        | taurocholic acid                                              | <a href="#">LMST05040001</a> |
| CA-3S                      | cholic acid 3-sulfate                                         |                              |
| GCA-3S                     | glycocholic acid 3-sulfate                                    |                              |
| TCA-3S                     | taurocholic acid 3-sulfate                                    | <a href="#">LMST05020031</a> |
| GCDCA                      | glycochenodeoxycholic acid                                    | <a href="#">LMST05030008</a> |

|                          |                                                                                                                                          |                              |
|--------------------------|------------------------------------------------------------------------------------------------------------------------------------------|------------------------------|
| TCDCA                    | taurochenodeoxycholic acid                                                                                                               | <a href="#">LMST05040005</a> |
| CDCA-3S                  | chenodeoxycholic acid 3-sulfate                                                                                                          | <a href="#">LMST05020024</a> |
| GCDCA-3S                 | glycochenodeoxycholic acid 3-sulfate                                                                                                     |                              |
| TCDCA-3S                 | taurochenodeoxycholic acid 3-sulfate                                                                                                     | <a href="#">LMST05020029</a> |
| GUDCA                    | glycoursodeoxycholic acid                                                                                                                | <a href="#">LMST05030016</a> |
| TUDCA                    | tauroursodeoxycholic acid                                                                                                                | <a href="#">LMST05040015</a> |
| UDCA-3S                  | ursodeoxycholic acid 3-sulfate                                                                                                           | <a href="#">LMST05020033</a> |
| GUDCA-3S                 | glycoursodeoxycholic acid 3-sulfate                                                                                                      | <a href="#">LMST05030012</a> |
| TUDCA-3S                 | tauroursodeoxycholic acid 3-sulfate                                                                                                      |                              |
| DCA-3S                   | deoxycholic acid 3-sulfate                                                                                                               | <a href="#">LMST05020038</a> |
| GDCA                     | glycodeoxycholic acid                                                                                                                    | <a href="#">LMST05030006</a> |
| TDCA                     | taurodeoxycholic acid                                                                                                                    | <a href="#">LMST05040013</a> |
| GDCA-3S                  | glycodeoxycholic acid 3-sulfate                                                                                                          |                              |
| TDCA-3S                  | taurodeoxycholic acid 3-sulfate                                                                                                          |                              |
| GLCA                     | glycolithocholic acid                                                                                                                    | <a href="#">LMST05030009</a> |
| TLCA                     | tauroolithocholic acid                                                                                                                   | <a href="#">LMST05040003</a> |
| LCA-3S                   | lithocholic acid 3-sulfate                                                                                                               | <a href="#">LMST05020015</a> |
| GLCA-3S                  | glycolithocholic acid 3-sulfate                                                                                                          | <a href="#">LMST05030004</a> |
| TLCA-3S                  | tauroolithocholic acid 3-sulfate                                                                                                         | <a href="#">LMST05020003</a> |
| GHCA                     | glycohyocholic acid                                                                                                                      |                              |
| THCA                     | taurohyocholic acid                                                                                                                      | <a href="#">LMST05040010</a> |
| GCA-1 $\beta$ -ol        | glyco 1 $\beta$ ,3 $\alpha$ ,7 $\alpha$ ,12 $\alpha$ -tetrahydroxy-5 $\beta$ -cholanoic acid<br>(glyco1 $\beta$ -hydroxy cholic acid)    |                              |
| TCA-1 $\beta$ -ol        | tauro 1 $\beta$ ,3 $\alpha$ ,7 $\alpha$ ,12 $\alpha$ -tetrahydroxy-5 $\beta$ -cholanoic acid<br>(tauro1 $\beta$ -hydroxy cholic acid)    |                              |
| CA-1 $\beta$ -ol         | 1 $\beta$ ,3 $\alpha$ ,7 $\alpha$ ,12 $\alpha$ -tetrahydroxy-5 $\beta$ -cholanoic acid<br>(1 $\beta$ -hydroxy cholic acid)               | <a href="#">LMST04010114</a> |
| GCA-6 $\alpha$ -ol       | glyco 3 $\alpha$ ,6 $\alpha$ ,7 $\alpha$ ,12 $\alpha$ -tetrahydroxy-5 $\beta$ -cholanoic acid<br>(glyco 6 $\alpha$ -hydroxy cholic acid) |                              |
| TCA-6 $\alpha$ -ol       | tauro 3 $\alpha$ ,6 $\alpha$ ,7 $\alpha$ ,12 $\alpha$ -tetrahydroxy-5 $\beta$ -cholanoic acid<br>(tauro 6 $\alpha$ -hydroxy cholic acid) |                              |
| CA-6 $\alpha$ -ol        | 3 $\alpha$ ,6 $\alpha$ ,7 $\alpha$ ,12 $\alpha$ -tetrahydroxy-5 $\beta$ -cholanoic acid<br>(6 $\alpha$ -hydroxy cholic acid)             | <a href="#">LMST04010118</a> |
| CDCA-1 $\beta$ -ol       | 1 $\beta$ ,3 $\alpha$ ,7 $\alpha$ -trihydroxy-5 $\beta$ -cholanoic acid<br>(1 $\beta$ -hydroxy chenodeoxycholic acid)                    | <a href="#">LMST04010058</a> |
| GCA- $\Delta^4$ -3-one   | glyco 7 $\alpha$ ,12 $\alpha$ -dihydroxy-3-oxo-4-cholenoic acid                                                                          |                              |
| TCA- $\Delta^4$ -3-one   | tauro 7 $\alpha$ ,12 $\alpha$ -dihydroxy-3-oxo-4-cholenoic acid                                                                          |                              |
| GCDCA- $\Delta^4$ -3-one | glyco 7 $\alpha$ -hydroxy-3-oxo-4-cholenoic acid                                                                                         | <a href="#">LMST05030020</a> |

|                                                            |                                                                                 |                              |
|------------------------------------------------------------|---------------------------------------------------------------------------------|------------------------------|
| TCDCA- $\Delta^4$ -3-one                                   | tauro 7 $\alpha$ -hydroxy-3-oxo-4-cholenoic acid                                |                              |
| $\Delta^5$ -3 $\beta$ -ol                                  | 3 $\beta$ -hydroxy-5-cholenoic acid                                             | <a href="#">LMST04010201</a> |
| G $\Delta^5$ -3 $\beta$ -ol                                | glyco 3 $\beta$ -hydroxy-5-cholenoic acid                                       |                              |
| T $\Delta^5$ -3 $\beta$ -ol                                | tauro 3 $\beta$ -hydroxy-5-cholenoic acid                                       |                              |
| $\Delta^5$ -3 $\beta$ -ol-3S                               | 3 $\beta$ -hydroxy-5-cholenoic acid 3-sulfate                                   |                              |
| G $\Delta^5$ -3 $\beta$ -ol-3S                             | glyco 3 $\beta$ -hydroxy-5-cholenoic acid 3-sulfate                             |                              |
| T $\Delta^5$ -7 $\alpha$ -ol-3S                            | tauro 3 $\beta$ -hydroxy-5-cholenoic acid 3-sulfate                             |                              |
| $\Delta^5$ -3 $\beta$ ,7 $\alpha$ -diol                    | 3 $\beta$ ,7 $\alpha$ -dihydroxy-5-cholenoic acid                               | <a href="#">LMST04010217</a> |
| G $\Delta^5$ -3 $\beta$ ,7 $\alpha$ -diol                  | glyco 3 $\beta$ ,7 $\alpha$ -dihydroxy-5-cholenoic acid                         |                              |
| T $\Delta^5$ -3 $\beta$ ,7 $\alpha$ -diol                  | tauro 3 $\beta$ ,7 $\alpha$ -dihydroxy-5-cholenoic acid                         |                              |
| $\Delta^5$ -3 $\beta$ ,7 $\alpha$ -diol-3S                 | 3 $\beta$ ,7 $\alpha$ -dihydroxy-5-cholen-24-oic acid 3-sulfate                 |                              |
| G $\Delta^5$ -3 $\beta$ ,7 $\alpha$ -diol-3S               | glyco 3 $\beta$ ,7 $\alpha$ -dihydroxy-5-cholenoic acid 3-sulfate               |                              |
| T $\Delta^5$ -3 $\beta$ ,7 $\alpha$ -diol-3S               | tauro 3 $\beta$ ,7 $\alpha$ -dihydroxy-5-cholenoic acid 3-sulfate               |                              |
| $\Delta^5$ -3 $\beta$ ,7 $\alpha$ ,12 $\alpha$ -triol      | 3 $\beta$ ,7 $\alpha$ ,12 $\alpha$ -trihydroxy-5-cholenoic acid                 | <a href="#">LMST04010227</a> |
| G $\Delta^5$ -3 $\beta$ ,7 $\alpha$ ,12 $\alpha$ -triol    | glyco 3 $\beta$ ,7 $\alpha$ ,12 $\alpha$ -trihydroxy-5-cholenoic acid           |                              |
| T $\Delta^5$ -3 $\beta$ ,7 $\alpha$ ,12 $\alpha$ -triol    | tauro 3 $\beta$ ,7 $\alpha$ ,12 $\alpha$ -trihydroxy-5-cholenoic acid           |                              |
| $\Delta^5$ -3 $\beta$ ,7 $\alpha$ ,12 $\alpha$ -triol-3S   | 3 $\beta$ ,7 $\alpha$ ,12 $\alpha$ -trihydroxy-5-cholen-24-oic acid 3-sulfate   |                              |
| G $\Delta^5$ -3 $\beta$ ,7 $\alpha$ ,12 $\alpha$ -triol-3S | glyco 3 $\beta$ ,7 $\alpha$ ,12 $\alpha$ -trihydroxy-5-cholenoic acid 3-sulfate |                              |
| T $\Delta^5$ -3 $\beta$ ,7 $\alpha$ ,12 $\alpha$ -triol-3S | tauro 3 $\beta$ ,7 $\alpha$ ,12 $\alpha$ -trihydroxy-5-cholenoic acid 3-sulfate |                              |

---
