# Supplementary material for: Characterization of long-chain fatty acid-linked bile acids: a major conjugation form of 3β-hydroxy bile acids in feces
Source: PubMed Central journal article supplement (PMC9587409; doi:10.1016/j.jlr.2022.100275), 2022-09-09
Supplement: mmc3.pdf [file mmc3.pdf]

**Supplemental table S2. LC/MS parameters for the BA quantitation in Condition II**

| Bile acid                        | RT<br>(min) | Precursor ion<br>(m/z) | Product ion<br>(m/z) | CE<br>(eV) | linear expression            | <i>r</i> | LOD<br>(nmol/g) |
|----------------------------------|-------------|------------------------|----------------------|------------|------------------------------|----------|-----------------|
| isoalloUCA                       | 2.79        | 407.3                  | 361.3                | 32         | $y = 0.133424 x + 0.000068$  | 0.9998   | 0.012           |
| isoUCA                           | 3.11        | 407.3                  | 343.3                | 32         | $y = 0.136398 x - 0.000182$  | 0.9999   | 0.012           |
| UCA                              | 4.81        | 407.3                  | 345.3                | 34         | $y = 0.039365 x - 0.000019$  | 0.9998   | 0.096           |
| alloUCA                          | 5.04        | 407.4                  | 359.3                | 35         | $y = 0.159070 x + 0.000532$  | 0.9998   | 0.012           |
| CA- $\Delta^4$ -3-one            | 5.76        | 403.3                  | 123.2                | 30         | $y = 0.180769 x + 0.000269$  | 0.9998   | 0.012           |
| isoCA                            | 6.23        | 407.3                  | 289.3                | 33         | $y = 0.076214 x + 0.000195$  | 0.9998   | 0.009           |
| nor-CA                           | 6.35        | 393.3                  | 329.2                | 34         | $y = 0.106972 x + 0.000311$  | 0.9996   | 0.015           |
| 7-oxo-DCA                        | 6.77        | 405.3                  | 289.2                | 35         | $y = 0.140445 x + 0.000021$  | 0.9996   | 0.006           |
| 12-oxo-CDCA                      | 7.94        | 447.3                  | 405.3                | 27         | $y = 0.354773 x + 0.001695$  | 0.9997   | 0.006           |
| HCA                              | 8.75        | 407.3                  | 389.2                | 33         | $y = 0.007984 x + 0.000010$  | 0.9992   | 0.180           |
| 3-oxo-UDCA                       | 9.02        | 403.3                  | 359.0                | 40         | $y = 0.117536 x + 0.000522$  | 0.9997   | 0.015           |
| MDCA                             | 9.36        | 437.3                  | 391.2                | 30         | $y = 0.345398 x + 0.001117$  | 0.9999   | 0.006           |
| 3-oxo-CA                         | 9.56        | 405.3                  | 289.3                | 36         | $y = 0.249166 x - 0.000090$  | 0.9999   | 0.009           |
| isoUDCA                          | 9.78        | 391.3                  | 391.3                | 33         | $y = 0.250825 x - 0.000550$  | 0.9997   | 0.009           |
| d <sub>5</sub> -CA               | 11.01       | 412.4                  | 348.3                | 34         |                              |          |                 |
| CA                               | 11.03       | 407.3                  | 343.3                | 33         | $y = 0.112079 x + 0.000199$  | 0.9998   | 0.009           |
| alloCA                           | 11.48       | 407.3                  | 361.2                | 30         | $y = 0.139344 x + 0.000256$  | 0.9998   | 0.012           |
| CA- $\Delta^{4,6}$ -3-one        | 11.67       | 385.3                  | 341.2                | 26         | $y = 0.388488 x + 0.000259$  | 0.9997   | 0.012           |
| UDCA                             | 11.80       | 437.3                  | 391.2                | 30         | $y = 0.370329 x + 0.002153$  | 0.9997   | 0.006           |
| 7-oxo- $\Delta^5$ -3 $\beta$ -ol | 11.83       | 387.2                  | 387.2                | 32         | $y = 0.222645 x + 0.000251$  | 0.9996   | 0.330           |
| 12-oxo-isoLCA                    | 12.19       | 391.3                  | 373.1                | -11        | $y = 2.15302 x + 0.006935$   | 0.9999   | 0.003           |
| HDCA                             | 12.85       | 437.3                  | 391.1                | 35         | $y = 0.551712 x + 0.002339$  | 0.9999   | 0.018           |
| 12 $\beta$ -OH-isoLCA            | 13.36       | 391.4                  | 345.2                | 36         | $y = 0.211340 x + 0.000752$  | 0.9999   | 0.012           |
| isoalloDCA                       | 13.42       | 391.6                  | 345.2                | 40         | $y = 0.118206 x - 0.0001058$ | 0.9996   | 0.012           |

|                             |       |       |       |     |                             |        |       |
|-----------------------------|-------|-------|-------|-----|-----------------------------|--------|-------|
| 3,12-dioxo-DCA              | 13.84 | 389.3 | 371.1 | -14 | $y = 0.916459 x + 0.003008$ | 0.9999 | 0.018 |
| DCA- $\Delta^4$ -3-one      | 13.88 | 387.3 | 123.2 | 37  | $y = 0.890582 x + 0.001195$ | 0.9999 | 0.003 |
| CDCA- $\Delta^4$ -3-one     | 14.22 | 387.3 | 369.3 | 28  | $y = 0.106055 x - 0.000380$ | 0.9996 | 0.009 |
| 12 $\beta$ -OH-LCA          | 15.31 | 391.4 | 345.2 | 35  | $y = 0.655488 x + 0.002512$ | 0.9997 | 0.006 |
| isoDCA                      | 15.33 | 391.2 | 345.3 | 30  | $y = 0.748451 x + 0.002801$ | 0.9997 | 0.006 |
| isoCDCA                     | 15.70 | 437.3 | 391.2 | 30  | $y = 0.319910 x + 0.000798$ | 0.9999 | 0.027 |
| 12-oxo-LCA                  | 17.24 | 391.2 | 373.1 | -11 | $y = 1.75490 x - 0.015476$  | 0.9987 | 0.042 |
| 7-oxo-LCA                   | 19.73 | 435.3 | 389.2 | 20  | $y = 0.504668 x + 0.001372$ | 0.9998 | 0.012 |
| 3-oxo-alloCDCA              | 20.73 | 389.3 | 327.4 | 46  | $y = 0.150838 x + 0.000533$ | 0.9999 | 0.084 |
| 3-oxo-alloDCA               | 20.74 | 389.4 | 343.3 | 31  | $y = 0.416706 x + 0.000381$ | 0.9997 | 0.018 |
| CDCA                        | 24.34 | 437.3 | 391.2 | 33  | $y = 0.404525 x + 0.002806$ | 0.9999 | 0.009 |
| 3-oxo-DCA                   | 24.71 | 389.3 | 343.2 | 34  | $y = 0.238870 x - 0.000514$ | 0.9998 | 0.066 |
| 3-oxo-CDCA                  | 25.19 | 389.3 | 389.3 | 37  | $y = 0.508835 x + 0.000356$ | 0.9997 | 0.030 |
| alloCDCA                    | 25.23 | 437.3 | 391.3 | 21  | $y = 0.224449 x + 0.000751$ | 0.9997 | 0.012 |
| d <sub>5</sub> -DCA         | 25.55 | 396.4 | 350.3 | 36  |                             |        |       |
| DCA                         | 25.57 | 391.3 | 345.3 | 34  | $y = 0.244963 x + 0.000464$ | 0.9999 | 0.012 |
| alloDCA                     | 25.98 | 391.3 | 345.3 | 33  | $y = 0.259484 x + 0.000391$ | 0.9999 | 0.006 |
| CDCA- $\Delta^{4,6}$ -3-one | 28.89 | 369.3 | 325.3 | 29  | $y = 0.172740 x + 0.000774$ | 0.9999 | 0.006 |
| LCA- $\Delta^4$ -3-one      | 30.23 | 371.3 | 123.1 | 32  | $y = 0.019466 x + 0.000039$ | 0.9999 | 0.075 |
| isoalloLCA                  | 30.92 | 375.3 | 375.3 | 30  | $y = 1.55412 x - 0.000312$  | 0.9998 | 0.030 |
| isoLCA                      | 30.92 | 375.3 | 375.3 | 30  | $y = 1.55412 x - 0.000312$  | 0.9998 | 0.030 |
| d <sub>4</sub> -LCA         | 32.42 | 379.3 | 379.3 | 36  |                             |        |       |
| LCA                         | 32.70 | 375.3 | 375.3 | 36  | $y = 0.808470 x + 0.007081$ | 0.9999 | 0.006 |
| 3-oxo-alloLCA               | 33.34 | 373.3 | 373.3 | 20  | $y = 3.91836 x + 0.002474$  | 0.9999 | 0.015 |
| 3-oxo-LCA                   | 33.34 | 373.4 | 373.4 | 34  | $y = 4.04908 x + 0.003678$  | 0.9999 | 0.009 |
| alloLCA                     | 33.43 | 375.3 | 357.3 | 19  | $y = 0.001131 x + 0.000052$ | 0.9975 | 6.3   |

RT, retention time; CE, collision energy; LOD, limit of detection.

**Supplemental table S3. LC/MS parameters for the FA quantitation in this study**

| Fatty acid                         | RT<br>(min) | Precursor ion<br>(m/z) | Product ion<br>(m/z) | CE<br>(eV) | linear expression          | <i>r</i> | LOD<br>(nmol/g) |
|------------------------------------|-------------|------------------------|----------------------|------------|----------------------------|----------|-----------------|
| Pam                                | 4.87        | 255.3                  | 237.4                | 22         | $y = 0.096422 x + 0.00550$ | 0.9995   | 35              |
| Ste                                | 6.54        | 283.3                  | 265.2                | 23         | $y = 0.570706 x + 0.02964$ | 0.9997   | 12              |
| Ole                                | 5.25        | 281.3                  | 263.3                | 22         | $y = 0.486907 x + 0.01633$ | 0.9997   | 8               |
| Lin                                | 4.34        | 279.3                  | 261.3                | 17         | $y = 0.295962 x + 0.00014$ | 0.9998   | 18              |
| d <sub>3</sub> -Pam                | 4.86        | 258.3                  | 240.3                | 20         |                            |          |                 |
| <sup>13</sup> C <sub>18</sub> -Ste | 6.51        | 301.3                  | 283.4                | 24         |                            |          |                 |

RT, retention time; CE, collision energy; LOD, limit of detection.

**Supplemental table S4. Effect of method A and method B on bile acids**

| Bile acids<br>(500pmol/ml)       | Method A (0.2N NaOH, 40°C 2h) |                                     | Method B (1N KOH/MeOH, reflux 1h) |                                     |
|----------------------------------|-------------------------------|-------------------------------------|-----------------------------------|-------------------------------------|
|                                  | Amount collected<br>(%)       | Product<br>Bile acid (%)            | Amount collected<br>(%)           | Product<br>Bile acid (%)            |
| 3-oxo-CA                         | 97.8                          |                                     | 23.2                              |                                     |
| 3-oxo-CDCA                       | 96.3                          |                                     | 19.5                              |                                     |
| 3-oxo-UDCA                       | 99.7                          |                                     | 19.8                              |                                     |
| 3-oxo-DCA                        | 101.3                         |                                     | 35.7                              |                                     |
| 3-oxo-LCA                        | 95.8                          |                                     | 50.9                              |                                     |
| 3-oxo-alloCDCA                   | 102.6                         |                                     | 46.8                              |                                     |
| 3-oxo-alloDCA                    | 101.6                         |                                     | 42.4                              |                                     |
| 3-oxo-alloLCA                    | 98.1                          |                                     | 28.8                              |                                     |
| 12-oxo-CDCA                      | 82.1                          |                                     | 0.0                               |                                     |
| 7-oxo- $\Delta^5$ - $3\beta$ -ol | 95.5                          |                                     | 0.0                               |                                     |
| CA- $\Delta^4$ -3-one            | 15.0                          | CA- $\Delta^{4,6}$ -3-one<br>66.9   | 0.0                               | CA- $\Delta^{4,6}$ -3-one<br>84.5   |
| CDCA- $\Delta^4$ -3-one          | 29.5                          | CDCA- $\Delta^{4,6}$ -3-one<br>62.8 | 0.0                               | CDCA- $\Delta^{4,6}$ -3-one<br>86.3 |
| DCA- $\Delta^4$ -3-one           | 60.2                          |                                     | 0.0                               |                                     |
| LCA- $\Delta^4$ -3-one           | 89.3                          |                                     | 1.0                               |                                     |
| GCA- $\Delta^4$ -3-one           | 70.4                          |                                     | 0.2                               |                                     |
| TCA- $\Delta^4$ -3-one           | 71.2                          |                                     | 0.0                               |                                     |
| GCDCA- $\Delta^4$ -3-one         | 82.3                          |                                     | 0.0                               |                                     |
| TCDC- $\Delta^4$ -3-one          | 36.6                          |                                     | 0.0                               |                                     |

Bile acids that changed by more than 5% before and after the treatments are shown. If the side reactant was a bile acid, the bile acid was noted and the amount after the reaction was shown.

**Supplemental table S5. Free BAs produced from FA-BA ester standards after method A and method B**

| FA-BA<br>(1000 pmol) | Method A     |        |     |        | Method B     |        |     |        |
|----------------------|--------------|--------|-----|--------|--------------|--------|-----|--------|
|                      | DCA          | isoDCA | LCA | isoLCA | DCA          | isoDCA | LCA | isoLCA |
|                      | (pmol found) |        |     |        | (pmol found) |        |     |        |
| Ac-LCA               | 0            | 0      | 40  | 0      | 0            | 0      | 787 | 200    |
| Ste-LCA              | 0            | 0      | 0   | 0      | 0            | 0      | 651 | 301    |
| Ste-DCA              | 0            | 0      | 0   | 0      | 967          | 0      | 0   | 0      |
| Ac-isoLCA            | 0            | 0      | 0   | 96     | 0            | 0      | 0   | 958    |
| Pam-isoLCA           | 0            | 0      | 0   | 0      | 0            | 0      | 0   | 1052   |
| Ste-isoLCA           | 0            | 0      | 0   | 0      | 0            | 0      | 0   | 984    |
| Ole-isoLCA           | 0            | 0      | 0   | 0      | 0            | 0      | 0   | 978    |
| Lin-isoLCA           | 0            | 0      | 0   | 0      | 0            | 0      | 0   | 1066   |
| Ac-isoDCA            | 0            | 248    | 0   | 0      | 0            | 1061   | 0   | 0      |
| Pam-isoDCA           | 0            | 0      | 0   | 0      | 0            | 973    | 0   | 0      |
| Ste-isoDCA           | 0            | 0      | 0   | 0      | 0            | 964    | 0   | 0      |
| Ole-isoDCA           | 0            | 0      | 0   | 0      | 0            | 978    | 0   | 0      |
| Lin-isoDCA           | 0            | 0      | 0   | 0      | 0            | 989    | 0   | 0      |
