# Supplementary material for: Characterization of long-chain fatty acid-linked bile acids: a major conjugation form of 3β-hydroxy bile acids in feces
Source: PubMed Central journal article supplement (PMC9587409; doi:10.1016/j.jlr.2022.100275), 2022-09-09
Supplement: mmc4.pdf [file mmc4.pdf]

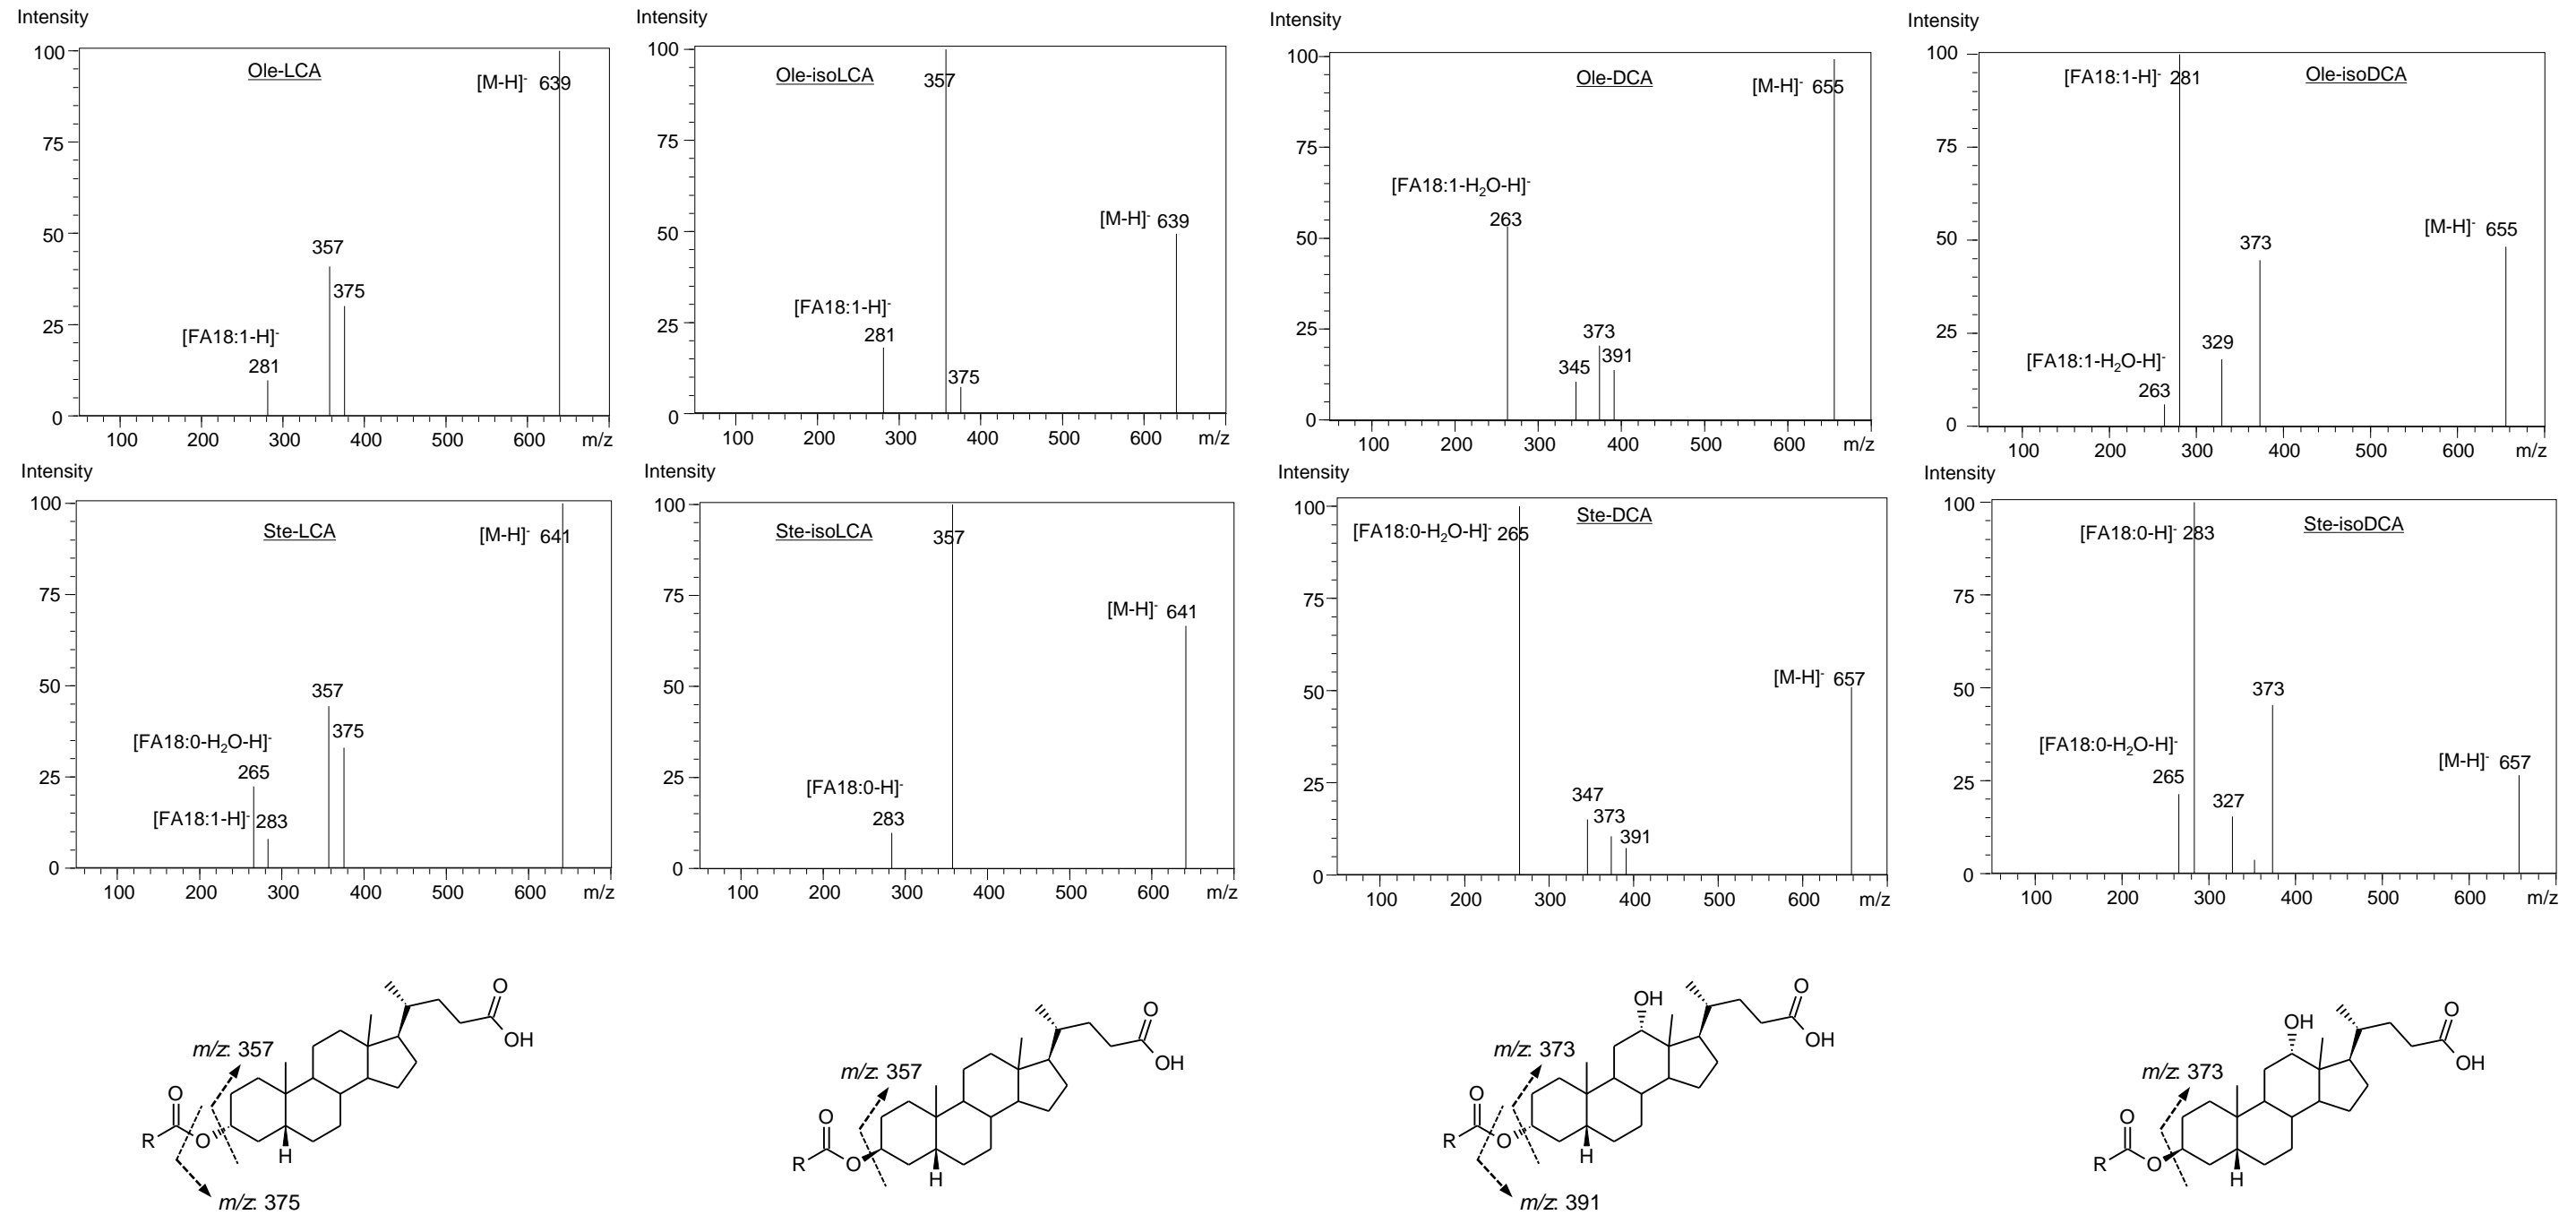

Supplemental figure S1. Negative-ion ESI MS/MS spectra of Ole-LCA, Ste-LCA, Ole-isoLCA, Ste-isoLCA, Ole-DCA, Ste-DCA, Ole-isoDCA, and Ste-isoDCA.
